# Supplementary material for: Asymmetric AgPd–AuNR heterostructure with enhanced photothermal performance and SERS activity
Source: Royal Society of Chemistry journal article supplement (doi:10.1039/c5nr07333b), 2015-12-24
Supplement: c5nr07333b1.pdf [file c5nr07333b1.pdf]

## Supporting Information

### Asymmetric AgPd-AuNR heterostructure with enhanced photothermal performance and SERS activity

Han Zhang, Zeke Liu, Xiaolin Kang, Jun Guo, Wanli Ma, and Si Cheng\*

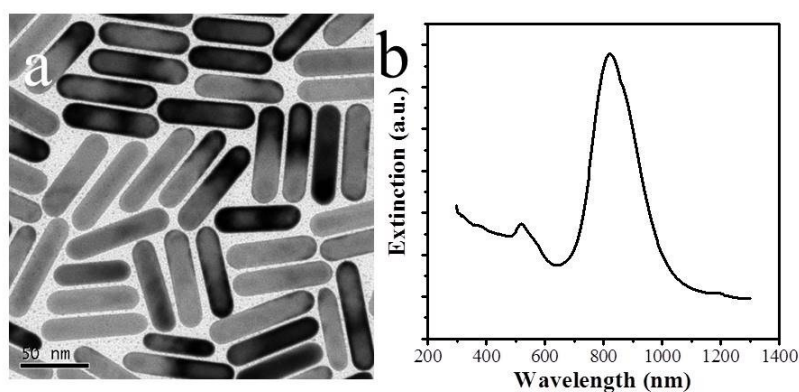

**Figure S1.** TEM image and extinction spectrum of AuNRs

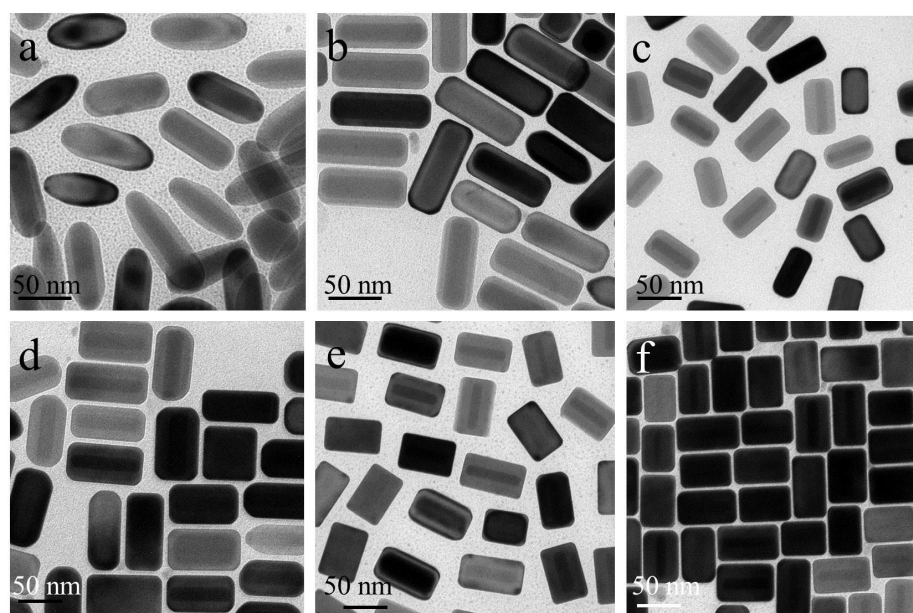

**Figure S2.** TEM images of AuNRs@Ag core-shell nanostructures with different thicknesses of Ag shell. a) AgNO<sub>3</sub> 60  $\mu$ L. b) AgNO<sub>3</sub> 100  $\mu$ L. c) AgNO<sub>3</sub> 200  $\mu$ L. d) AgNO<sub>3</sub> 300  $\mu$ L. e) AgNO<sub>3</sub> 400  $\mu$ L. f) AgNO<sub>3</sub> 500  $\mu$ L. From a to f, the width of AuNR@Ag nanorods varied from  $28.3 \pm 1.3$  nm,  $29.8 \pm 1.6$  nm,  $36.2 \pm 1.8$  nm,  $41.2 \pm 2.3$  nm,  $44.6 \pm 2.0$  nm to  $45.9 \pm 3.1$  nm.

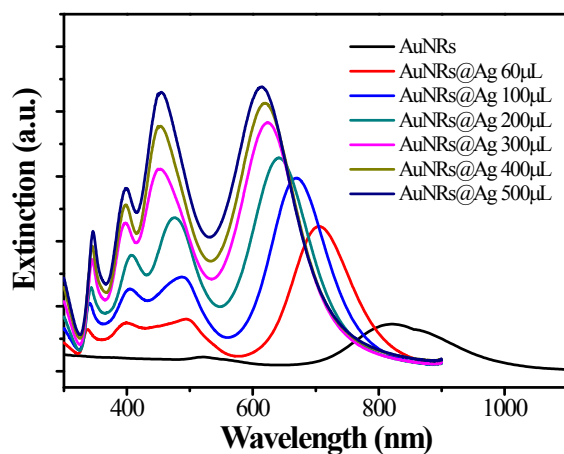

**Figure S3.** Extinction spectra of AuNRs@Ag core-shell nanostructures with different volume of AgNO<sub>3</sub> ranging from 60 μL to 500 μL.

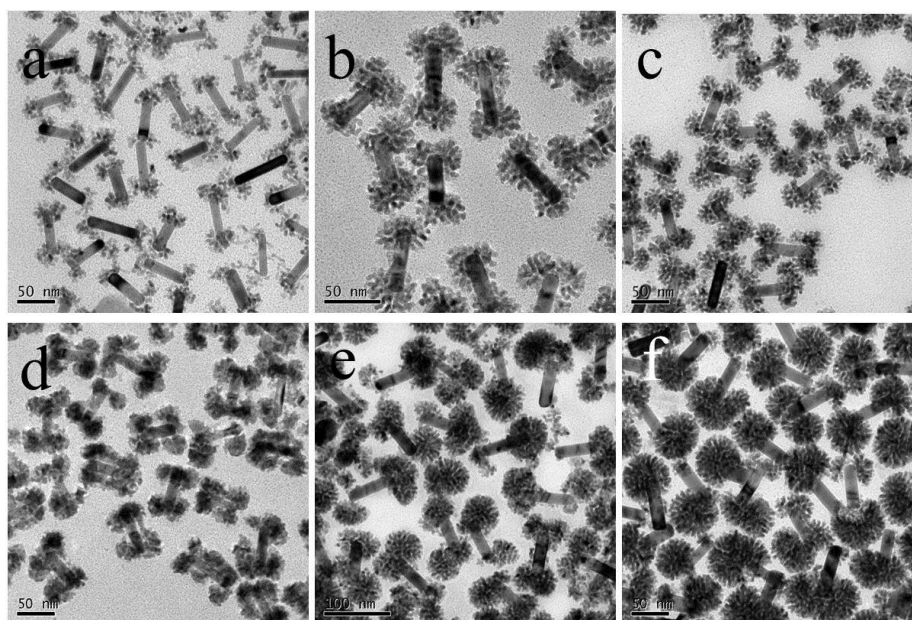

**Figure S4.** TEM images of AuNRs@AgPd structures prepared with 60 μl (a), 100 μl (b), 200 μl (c), 300 μl (d), 400 μl (e) and 500 μl (f) AgNO<sub>3</sub> (0.01 M) solution, respectively.

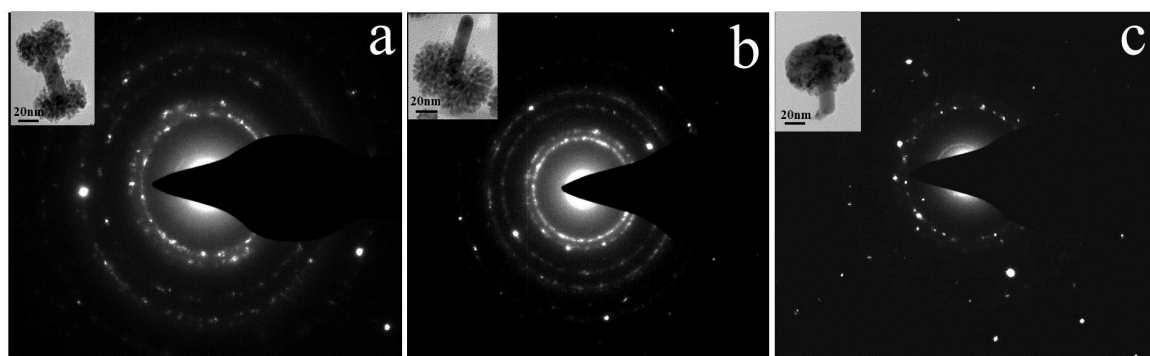

**Figure S5.** SEAD patterns of nanodumbbell, dandelion and lollipop nanostructures

## Dandelion

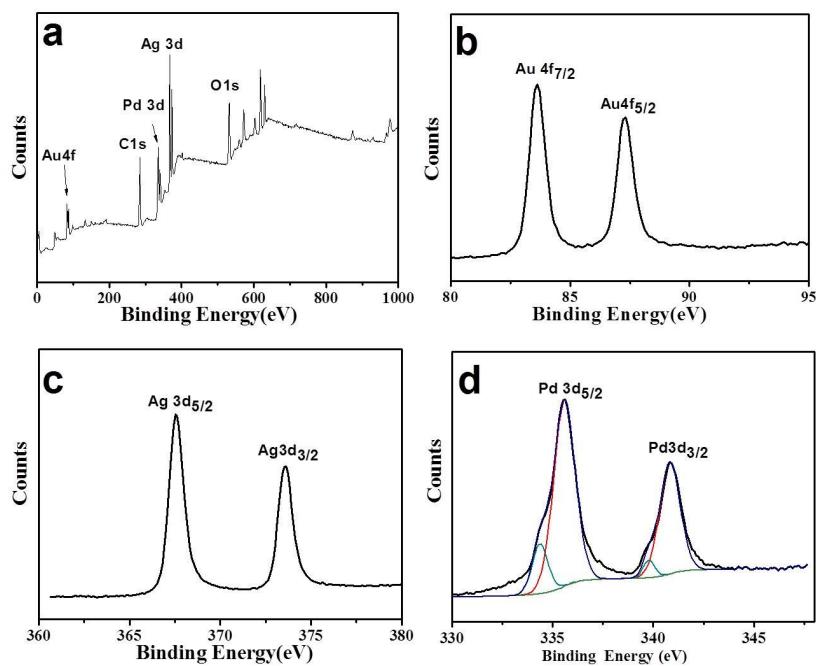

## Nanodumbbell

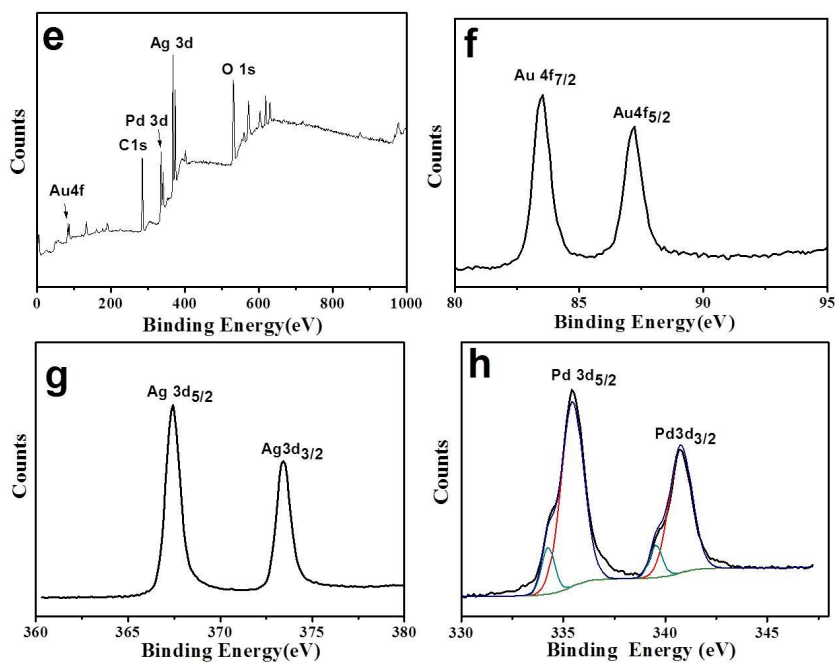

**Figure S6.** XPS spectra of the dandelion NPs (a-d) and nanodumbbell (e-f). (a,e) Survey spectrum, (b,c,d,f,g, h) the high resolution spectra of Au 4f, Ag 3d and Pd 3d.

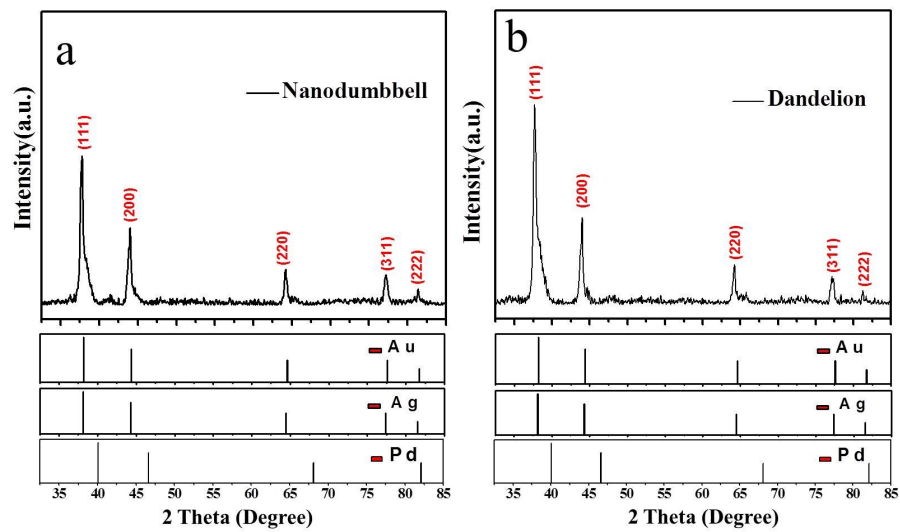

Figure S7 XRD patterns of nanodumbbell (a) and dandelion NPs (b)

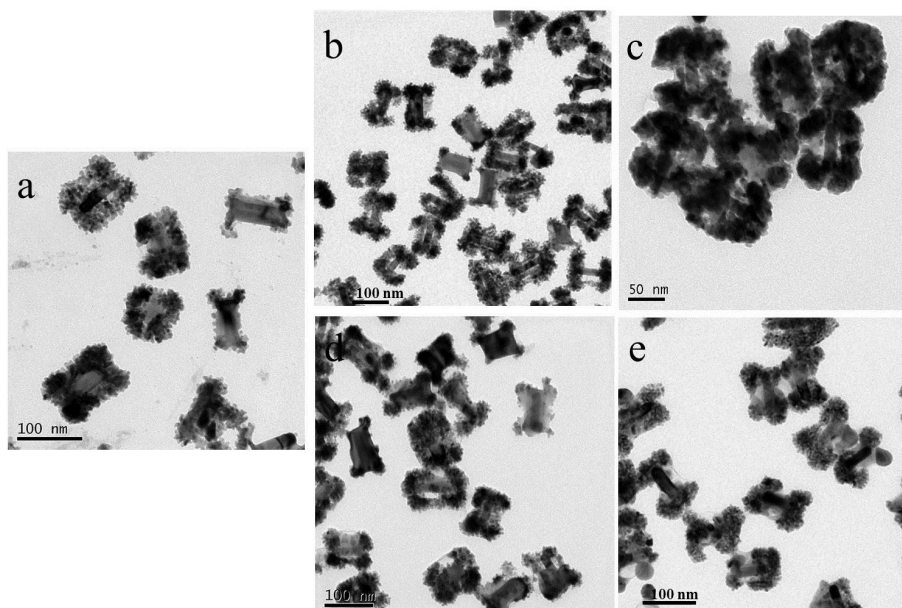

**Figure S8.** TEM images of AuNRs@AgPd nanostructures with different amount of AA and CTAC. a) no CTAC and no AA. b) no CTAC, 20 μL AA. c) no CTAC, 60 μL AA. d) no AA, 30 μL CTAC. e) no AA, 60 μL CTAC. The volume of AgNO<sub>3</sub> is 500 μL.



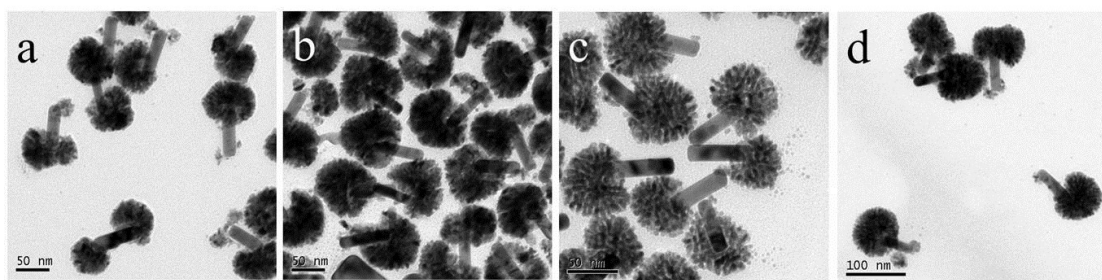

**Figure S9.** TEM images of AuNRs@AgPd nanostructures with different amount of AA and CTAC. a) 30  $\mu\text{L}$  CTAC and 20  $\mu\text{L}$  AA. b) 30  $\mu\text{L}$  CTAC and 60  $\mu\text{L}$  AA. c) 60  $\mu\text{L}$  CTAC and 20  $\mu\text{L}$  AA. d) 60  $\mu\text{L}$  CTAC and 60  $\mu\text{L}$  AA. The volume of  $\text{AgNO}_3$  is 500  $\mu\text{L}$ .

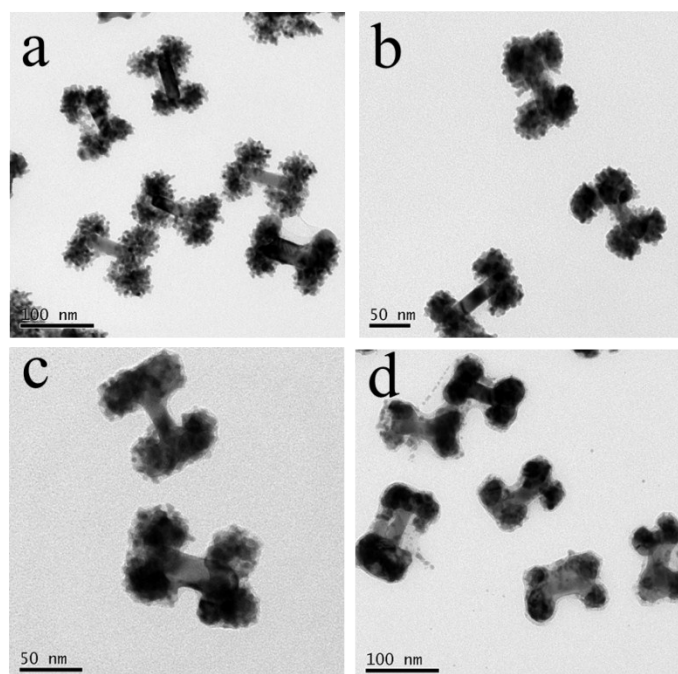

**Figure S10.** TEM images of AuNRs@AgPd nanodumbbell nanostructures with different amount of AA. a) 20  $\mu\text{L}$  AA. b) 30  $\mu\text{L}$  AA. c) 40  $\mu\text{L}$  AA. d) 60  $\mu\text{L}$  AA. The volume of  $\text{AgNO}_3$  is 300  $\mu\text{L}$ .

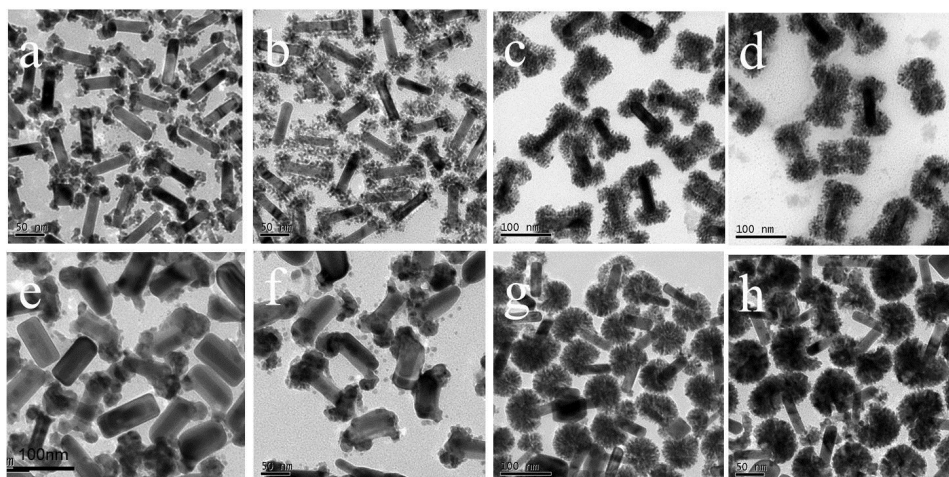

**Figure S11.** TEM images of nanodumbbell (top) and dandelion (bottom) nanostructures with different amount of  $\text{H}_2\text{PdCl}_4$ . a,e) 10  $\mu\text{L}$ . b,f) 20  $\mu\text{L}$ . c,g) 60  $\mu\text{L}$ . d,h) 80  $\mu\text{L}$ .

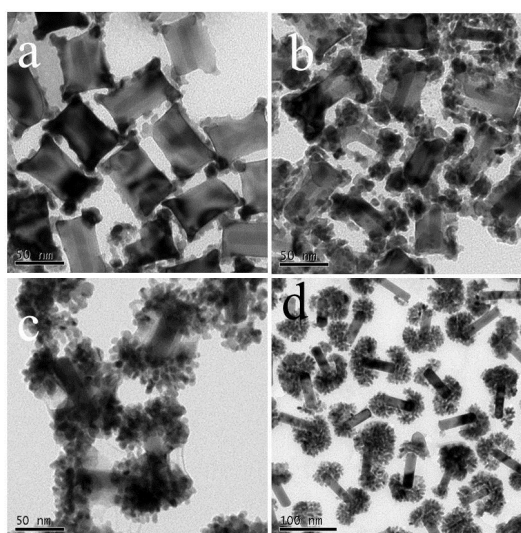

**Figure S12.** TEM images of AuNRs@AgPd dandelion nanostructures at different reaction stages. a) After the very early Pd precursor injection without additional CTAC and AA. b) 1 min. c) 5 min. d) At high relative ratio of  $\text{AgNO}_3$ . The reaction time is 1h.

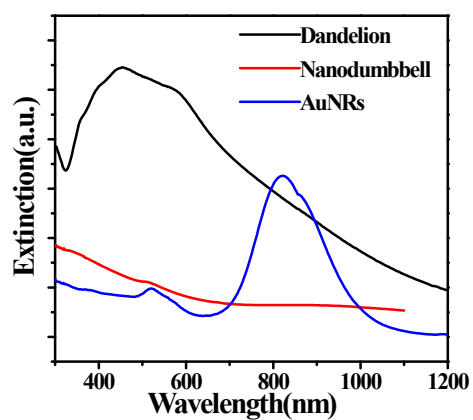

**Figure S13.** Extinction spectra of gold nanorods, nanodumbbell and dandelion NPs.

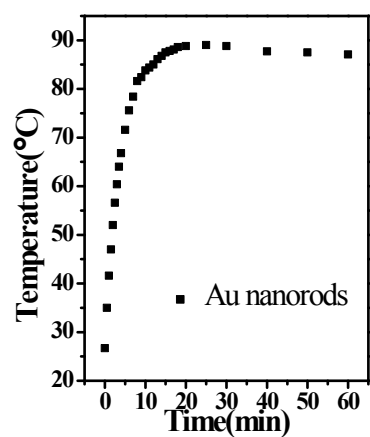

**Figure S14.** The temperature rise traces of the gold nanorods solution at 1.45 W of the 808 nm laser.

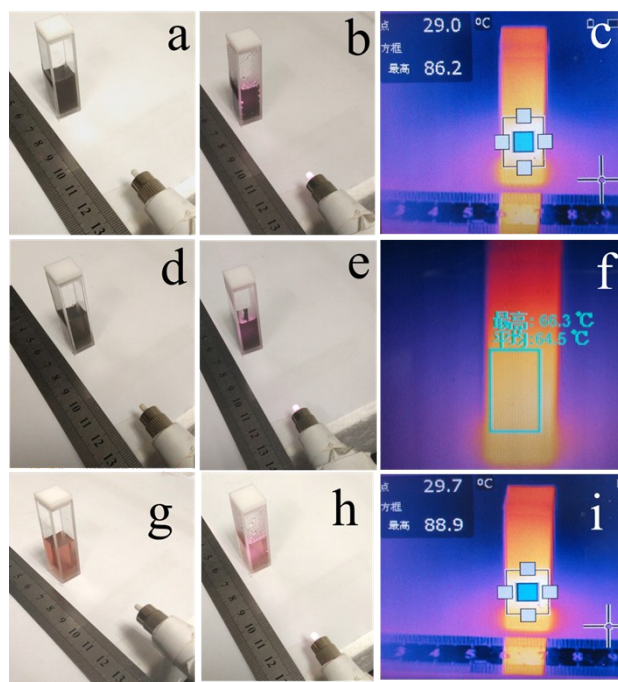

**Figure S15.** The digital photographs of the dandelion NPs(a-c), nanodummbbell NPs(d-f) and gold nanorods(g-i) solutions before (left), after (middle) illuminated by laser and the digital photographs of final steady-state temperature (right).

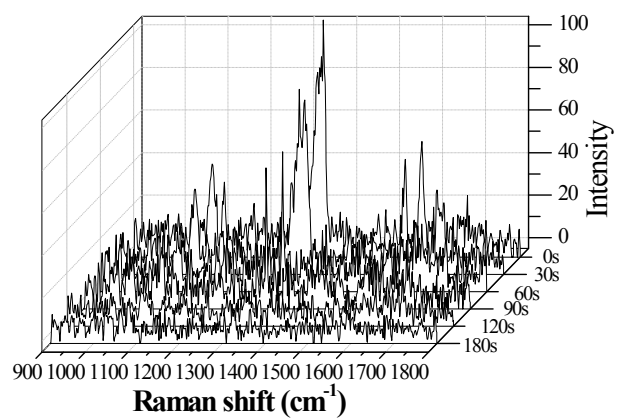

**Figure S16.** Raman spectra of the reduction of 4-NTP to 4-ATP by nanodumbbell NPs at different reaction time.
